# Supplementary material for: Expediting the Search for Climate-Resilient Reef Corals in the Coral Triangle with Artificial Intelligence
Source: MDPI journal article supplement (doi:10.3390/app122412955), 2022-12-16
Supplement: s1 [file s1]

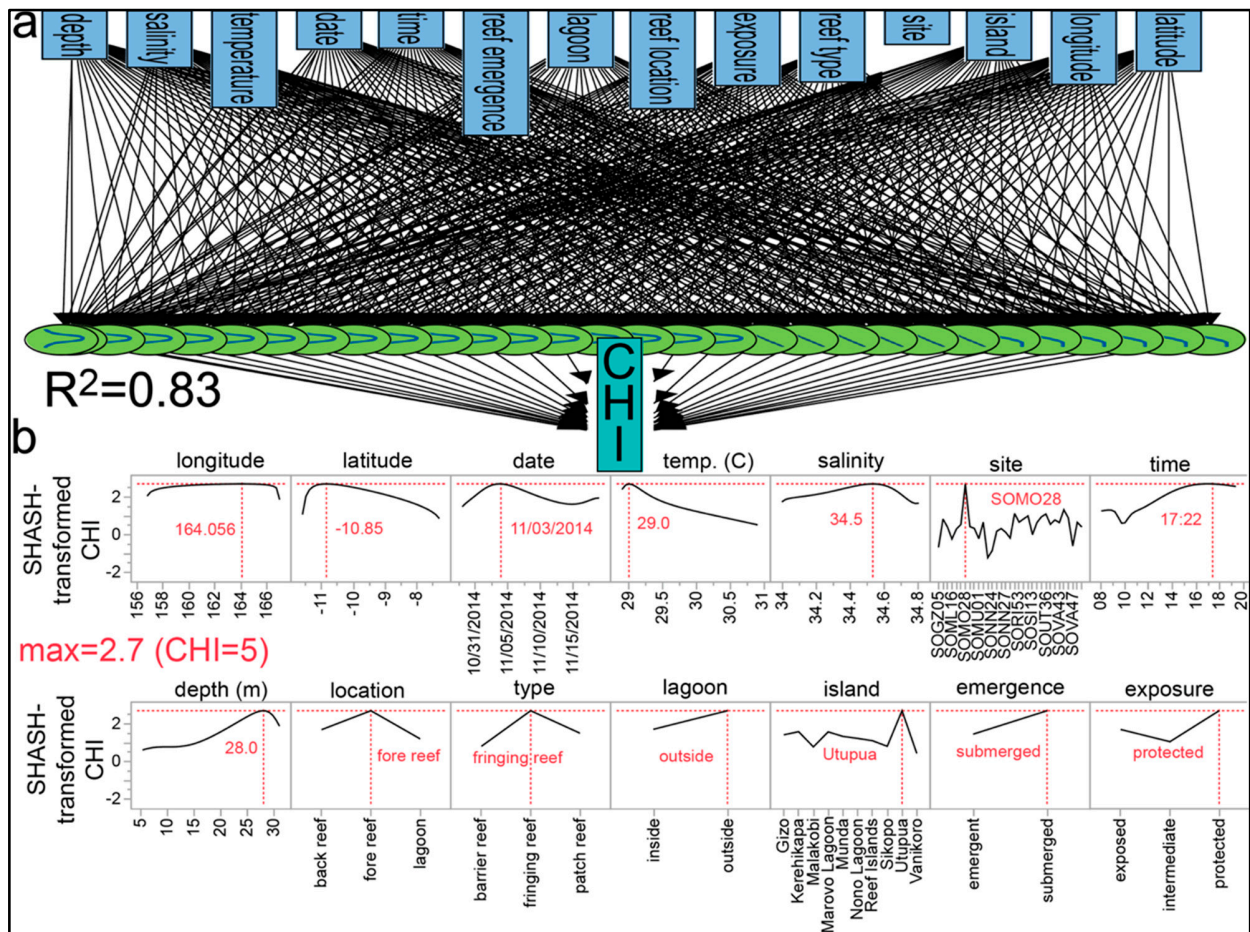

**Figure S1.** A neural network (a) for predicting the coral health index (CHI) from 14 environmental (ENV) parameters and a machine-learning-based “desirability analysis” (b) based on the associated model. The model was validated with test sample data (i.e., both holdback validation samples & test data from corals from random field sites). The conditions/levels resulting in a hypothetical maximum CHI are displayed in the center of each plot in (b). The maximum SHASH-transformed CHI obtained of 2.7 corresponds to a raw CHI of ~ 5.

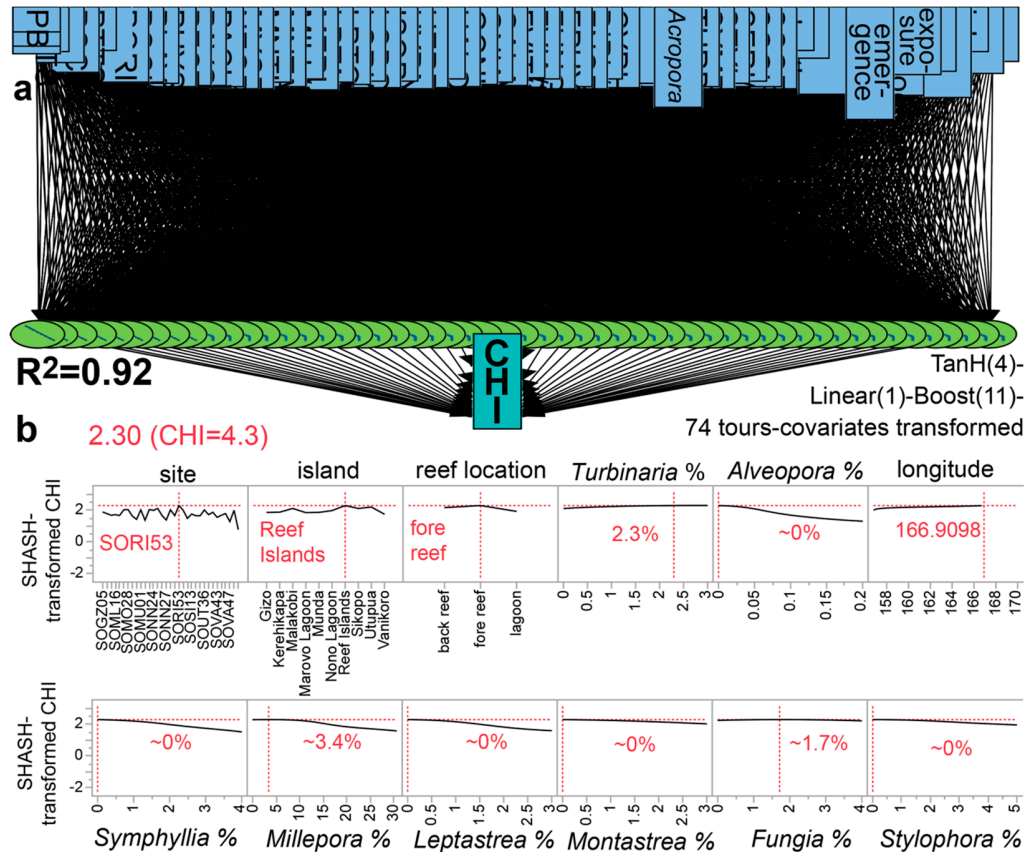

**Figure S2.** A neural network (a) for predicting the coral health index (CHI) from both 14 environmental parameters and 50 benthic survey parameters, followed by a machine-learning-based “desirability analysis” (b) based on the associated model. Twenty percent of coral samples were randomly excluded from the model and then used as validation samples. Only select predictors have been shown in (a). PB=percent barren substrate. The highest plotted values in each of the sub-panels within (b) represent the condition in which the SHASH-transformed CHI was maximized; only the 12 most influential predictors have been shown (based on a dependent resampled inputs algorithm). The maximum SHASH-transformed CHI obtained of 2.3 corresponds to a raw, back-transformed CHI of ~4.3. The predictors are presented in order of influence, from most (top-left) to least important (bottom-right).

**Table S1.** All partial least squares analyses (non-iterative [NIPALS]) of multivariate coral physiology (n=120). Models that yielded no meaningful solution are denoted by “0 factors,” with those that could not be run due to computational limitations deemed “too computationally intensive” (TCI; >64 GB RAM). Coral health was assessed as either the 16 coral physiological response variables (PRV) or the 4 factors from a factor analysis of these PRV as Y’s (“4 PRV factors”). When the ecological (ECO) parameters were included as X’s, either all 50 benthic categories (“ECO(50)”) or the 15 factors from a factor analysis of these 50 bins (“ECO(15)”) were included. Superscripts represent degree of factorial combinations of the respective model X’s. ENV=environmental parameters (see Table 2.). RS=response surface. Val col=validation column. Val w/test=both validation and test data columns.

| Model Y’s     | Model X’s            | Validation type | Conclusion        |
|---------------|----------------------|-----------------|-------------------|
| 16 PRV        | ENV(14) <sup>1</sup> | Kfold7          | 0 factors         |
| 16 PRV        | ENV(14) <sup>1</sup> | Val col         | 0 factors         |
| 16 PRV        | ENV(14) <sup>1</sup> | Val w/ test     | 0 factors         |
| 16 PRV        | ENV(14) <sup>2</sup> | Kfold7          | 0 factors         |
| 16 PRV        | ENV(14) <sup>2</sup> | Val col         | 0 factors         |
| 16 PRV        | ENV(14) <sup>2</sup> | Val w/ test     | 0 factors         |
| 16 PRV        | ENV(14) <sup>3</sup> | Kfold7          | 0 factors         |
| 16 PRV        | ENV(14) <sup>3</sup> | Val col         | 0 factors         |
| 16 PRV        | ENV(14) <sup>3</sup> | Val w/ test     | 0 factors         |
| 16 PRV        | ENV(14)-RS           | Kfold7          | 0 factors         |
| 16 PRV        | ENV(14)-RS           | Val col         | 0 factors         |
| 16 PRV        | ENV(14)-RS           | Val w/ test     | 0 factors         |
| 4 PRV factors | ENV(14) <sup>1</sup> | Kfold7          | 0 factors         |
| 4 PRV factors | ENV(14) <sup>1</sup> | Val col         | 0 factors         |
| 4 PRV factors | ENV(14) <sup>1</sup> | Val w/ test     | 9 factors (48%)   |
| 4 PRV factors | ENV(14) <sup>2</sup> | Kfold7          | 0 factors         |
| 4 PRV factors | ENV(14) <sup>2</sup> | Val col         | 0 factors         |
| 4 PRV factors | ENV(14) <sup>2</sup> | Val w/ test     | 15 factors (57%)  |
| 4 PRV factors | ENV(14) <sup>3</sup> | Kfold7          | 0 factors         |
| 4 PRV factors | ENV(14) <sup>3</sup> | Val col         | 0 factors         |
| 4 PRV factors | ENV(14) <sup>3</sup> | Val w/ test     | 7 factors (52%)   |
| 4 PRV factors | ENV(14)-RS           | Kfold7          | 0 factors         |
| 4 PRV factors | ENV(14)-RS           | Val col         | 0 factors         |
| 4 PRV factors | ENV(14)-RS           | Val w/ test     | 8 factors (51.5%) |
| 16 PRV        | ECO(50) <sup>1</sup> | Kfold7          | 2 factors (16%)   |
| 16 PRV        | ECO(50) <sup>1</sup> | Val col         | 0 factors         |
| 16 PRV        | ECO(50) <sup>1</sup> | Val w/ test     | 1 factor (9.9%)   |
| 16 PRV        | ECO(50) <sup>2</sup> | Kfold7          | 2 factors (16.5%) |
| 16 PRV        | ECO(50) <sup>2</sup> | Val col         | 0 factors         |
| 16 PRV        | ECO(50) <sup>2</sup> | Val w/ test     | 2 factors (19%)   |
| 16 PRV        | ECO(50) <sup>3</sup> | Kfold7          | 2 factors (17%)   |
| 16 PRV        | ECO(50) <sup>3</sup> | Val col         | 0 factors         |
| 16 PRV        | ECO(50) <sup>3</sup> | Val w/ test     | 2 factors (19.5%) |
| 16 PRV        | ECO(50)-RS           | Kfold7          | 2 factors (16.5%) |

| <b>Model Y's</b> | <b>Model X's</b>               | <b>Validation type</b> | <b>Conclusion</b> |
|------------------|--------------------------------|------------------------|-------------------|
| 16 PRV           | ECO(50)-RS                     | Val col                | 0 factors         |
| 16 PRV           | ECO(50)-RS                     | Val w/ test            | 2 factors (19%)   |
| 4 PRV factors    | ECO(50) <sup>1</sup>           | Kfold7                 | 0 factors         |
| 4 PRV factors    | ECO(50) <sup>1</sup>           | Val col                | 0 factors         |
| 4 PRV factors    | ECO(50) <sup>1</sup>           | Val w/ test            | 1 factor (9.3%)   |
| 4 PRV factors    | ECO(50) <sup>2</sup>           | Kfold7                 | 0 factors         |
| 4 PRV factors    | ECO(50) <sup>2</sup>           | Val col                | 0 factors         |
| 4 PRV factors    | ECO(50) <sup>2</sup>           | Val w/ test            | 3 factors (28%)   |
| 4 PRV factors    | ECO(50) <sup>3</sup>           | Kfold7                 | 2 factors (18%)   |
| 4 PRV factors    | ECO(50) <sup>3</sup>           | Val col                | 0 factors         |
| 4 PRV factors    | ECO(50) <sup>3</sup>           | Val w/ test            | 4 factors (30.5%) |
| 4 PRV factors    | ECO(50)-RS                     | Kfold7                 | 0 factors         |
| 4 PRV factors    | ECO(50)-RS                     | Val col                | 0 factors         |
| 4 PRV factors    | ECO(50)-RS                     | Val w/ test            | 3 factors (28%)   |
| 16 PRV           | ECO(15) <sup>1</sup>           | Kfold7                 | 0 factors         |
| 16 PRV           | ECO(15) <sup>1</sup>           | Val col                | 0 factors         |
| 16 PRV           | ECO(15) <sup>1</sup>           | Val w/ test            | 0 factors         |
| 16 PRV           | ECO(15) <sup>2</sup>           | Kfold7                 | 0 factors         |
| 16 PRV           | ECO(15) <sup>2</sup>           | Val col                | 0 factors         |
| 16 PRV           | ECO(15) <sup>2</sup>           | Val w/ test            | 0 factors         |
| 16 PRV           | ECO(15) <sup>3</sup>           | Kfold7                 | 0 factors         |
| 16 PRV           | ECO(15) <sup>3</sup>           | Val col                | 0 factors         |
| 16 PRV           | ECO(15) <sup>3</sup>           | Val w/ test            | 0 factors         |
| 16 PRV           | ECO(15)-RS                     | Kfold7                 | 2 factors (18%)   |
| 16 PRV           | ECO(15)-RS                     | Val col                | 0 factors         |
| 16 PRV           | ECO(15)-RS                     | Val w/ test            | 0 factors         |
| 4 PRV factors    | ECO(15) <sup>1</sup>           | Kfold7                 | 0 factors         |
| 4 PRV factors    | ECO(15) <sup>1</sup>           | Val col                | 0 factors         |
| 4 PRV factors    | ECO(15) <sup>1</sup>           | Val w/ test            | 0 factors         |
| 4 PRV factors    | ECO(15) <sup>2</sup>           | Kfold7                 | 0 factors         |
| 4 PRV factors    | ECO(15) <sup>2</sup>           | Val col                | 0 factors         |
| 4 PRV factors    | ECO(15) <sup>2</sup>           | Val w/ test            | 2 factors (25%)   |
| 4 PRV factors    | ECO(15) <sup>3</sup>           | Kfold7                 | 0 factors         |
| 4 PRV factors    | ECO(15) <sup>3</sup>           | Val col                | 0 factors         |
| 4 PRV factors    | ECO(15) <sup>3</sup>           | Val w/ test            | 2 factors (19%)   |
| 4 PRV factors    | ECO(15)-RS                     | Kfold7                 | 0 factors         |
| 4 PRV factors    | ECO(15)-RS                     | Val col                | 0 factors         |
| 4 PRV factors    | ECO(15)-RS                     | Val w/ test            | 1 factor (13%)    |
| 16 PRV           | ENV(14)+ECO(50)                | Kfold7                 | 0 factors         |
| 16 PRV           | ENV(14)+ECO(50)                | Val col                | 0 factors         |
| 16 PRV           | ENV(14)+ECO(50)                | Val w/ test            | 1 factor (18%)    |
| 16 PRV           | (ENV[14]+ECO[50]) <sup>2</sup> | Kfold7                 | 0 factors         |
| 16 PRV           | (ENV[14]+ECO[50]) <sup>2</sup> | Val col                | 0 factors         |
| 16 PRV           | (ENV[14]+ECO[50]) <sup>2</sup> | Val w/ test            | 1 factor (21%)    |
| 16 PRV           | (ENV(14)+ECO[50]) <sup>3</sup> | Kfold7                 | TCI               |

| Model Y's     | Model X's                      | Validation type | Conclusion       |
|---------------|--------------------------------|-----------------|------------------|
| 16 PRV        | (ENV(14)+ECO[50]) <sup>3</sup> | Val col         | 0 factors        |
| 16 PRV        | (ENV(14)+ECO[50]) <sup>3</sup> | Val w/ test     | 0 factors        |
| 16 PRV        | (ENV[14]+ECO[50])-RS           | Kfold7          | 0 factors        |
| 16 PRV        | (ENV[14]+ECO[50])-RS           | Val col         | 0 factors        |
| 16 PRV        | (ENV[14]+ECO[50])-RS           | Val w/ test     | 1 factor (21%)   |
| 4 PRV factors | ENV(14)+ECO(50)                | Kfold7          | 1 factor (16%)   |
| 4 PRV factors | ENV(14)+ECO(50)                | Val col         | 0 factors        |
| 4 PRV factors | ENV(14)+ECO(50)                | Val w/ test     | 4 factors (46%)  |
| 4 PRV factors | (ENV[14]+ECO[50]) <sup>2</sup> | Kfold7          | 0 factors        |
| 4 PRV factors | (ENV[14]+ECO[50]) <sup>2</sup> | Val col         | 0 factors        |
| 4 PRV factors | (ENV[14]+ECO[50]) <sup>2</sup> | Val w/ test     | 13 factors (59%) |
| 4 PRV factors | (ENV(14)+ECO[50]) <sup>3</sup> | Kfold7          | TCI              |
| 4 PRV factors | (ENV(14)+ECO[50]) <sup>3</sup> | Val col         | 0 factors        |
| 4 PRV factors | (ENV(14)+ECO[50]) <sup>3</sup> | Val w/ test     | TCI              |
| 4 PRV factors | (ENV[14]+ECO[50])-RS           | Kfold7          | 0 factors        |
| 4 PRV factors | (ENV[14]+ECO[50])-RS           | Val col         | 0 factors        |
| 4 PRV factors | (ENV[14]+ECO[50])-RS           | Val w/ test     | 13 factors (59%) |
| 16 PRV        | ENV(14)+ECO(15)                | Kfold7          | 0 factors        |
| 16 PRV        | ENV(14)+ECO(15)                | Val col         | 0 factors        |
| 16 PRV        | ENV(14)+ECO(15)                | Val w/ test     | 0 factors        |
| 16 PRV        | (ENV[14]+ECO[15]) <sup>2</sup> | Kfold7          | 0 factors        |
| 16 PRV        | (ENV[14]+ECO[15]) <sup>2</sup> | Val col         | 0 factors        |
| 16 PRV        | (ENV[14]+ECO[15]) <sup>2</sup> | Val w/ test     | 0 factors        |
| 16 PRV        | (ENV[14]+ECO[15]) <sup>3</sup> | Kfold7          | 0 factors        |
| 16 PRV        | (ENV[14]+ECO[15]) <sup>3</sup> | Val col         | 0 factors        |
| 16 PRV        | (ENV[14]+ECO[15]) <sup>3</sup> | Val w/ test     | 0 factors        |
| 16 PRV        | (ENV[14]+ECO[15])-RS           | Kfold7          | 0 factors        |
| 16 PRV        | (ENV[14]+ECO[15])-RS           | Val col         | 0 factors        |
| 16 PRV        | (ENV[14]+ECO[15])-RS           | Val w/ test     | 0 factors        |
| 4 PRV factors | ENV(14)+ECO(15)                | Kfold7          | 1 factor (15%)   |
| 4 PRV factors | ENV(14)+ECO(15)                | Val col         | 0 factors        |
| 4 PRV factors | ENV(14)+ECO(15)                | Val w/ test     | 1 factor (14%)   |
| 4 PRV factors | (ENV[14]+ECO[15]) <sup>2</sup> | Kfold7          | 0 factors        |
| 4 PRV factors | (ENV[14]+ECO[15]) <sup>2</sup> | Val col         | 0 factors        |
| 4 PRV factors | (ENV[14]+ECO[15]) <sup>2</sup> | Val w/ test     | 4 factors (53%)  |
| 4 PRV factors | (ENV[14]+ECO[15]) <sup>3</sup> | Kfold7          | 0 factors        |
| 4 PRV factors | (ENV[14]+ECO[15]) <sup>3</sup> | Val col         | 0 factors        |
| 4 PRV factors | (ENV[14]+ECO[15]) <sup>3</sup> | Val w/ test     | 1 factor (19%)   |
| 4 PRV factors | (ENV[14]+ECO[15])-RS           | Kfold7          | 0 factors        |
| 4 PRV factors | (ENV[14]+ECO[15])-RS           | Val col         | 0 factors        |
| 4 PRV factors | (ENV[14]+ECO[15])-RS           | Val w/ test     | 1 factor (19%)   |

**Table S2.** Predictive models of the coral health index (CHI; SHASH-transformed;  $n \sim 80,000$ ) in order from fewest (9) to most (64) model terms. In all models, CHI was the Y, and first, second, and third-order factorial combinations of environmental (ENV) and/or ecological (ECO; i.e., benthic) predictors were considered. In the neural network (NN) GUI, models (sample size in “Model details” column) were run with either one (“HL(1)”) or two (“HL(2)”) hidden layers (HL); with the former, up to 20 boosts were allowed (learning rate: 0.05-0.3). The number of activation nodes ranged from 0 to 4 (up to 6 in models followed by “-6,” which also featured up to 200 tours instead of the maximum of 100 for all other NN models & 30 boosts maximum instead of 20 for the HL1 models), the weight decay penalty was used, and up to 100 tours were considered; covariates were transformed in half of all models, and half were robustly fit (randomly assigned in both cases). For ECO, either all 50 categories were tested (first- & second-order factorials+response surface [RS]) or the factor loading scores ( $n=15$ ) were instead used. When test samples were used in addition to validation (Val) samples (Val w/test), the test  $R^2$  is shown in the “ $R^2$ ” column; all other values represent validation  $R^2$  (from Kfold, 20% holdback, or validation column [Val col]-based validation). Details of several models with  $R^2 > 0.8$  (highlighted in green) are shown in Table 3; these models were re-run at least 10 times, with the mean validation  $R^2$  presented in the table (necessary because of the large number of tours, which means successive iterations yield slightly different results; “—”=mean validation or test  $R^2 < 0.8$  upon averaging results of these additional runs). GEN=7 general benthic categories (see online supplemental data file [OSDF; Supplementary file S2]). Gen-reg=generalized regression. NA=not applicable. NIPALS=non-iterative partial least squares. TCI=too computationally intensive ( $>64$  GB RAM).

| X's (#)                                                                                                        | Validation   | Model type     | $R^2$  | Model details                    |
|----------------------------------------------------------------------------------------------------------------|--------------|----------------|--------|----------------------------------|
| <b>ENV(9): latitude, longitude, island, depth, reef type, reef location, lagoon, emergence, &amp; exposure</b> |              |                |        |                                  |
| ENV(9) <sup>1</sup>                                                                                            | Kfold5       | Model screen   | 0.32   | NN: TanH(3)-Boost(16)            |
| ENV(9) <sup>1</sup>                                                                                            | Val col      | Model screen   | 0.21   | NN: TanH(3)-Boost(20)            |
| ENV(9) <sup>1</sup>                                                                                            | Val w/test   | Model screen   | 0.45   | Gen-reg-pruned forward selection |
| ENV(9) <sup>1</sup>                                                                                            | 20% holdback | NN GUI-HL(1)   | 0.56   | 5,000 models tested              |
| ENV(9) <sup>1</sup>                                                                                            | Val col      | NN GUI-HL(1)   | 0.43   | 5,000 models tested              |
| ENV(9) <sup>1</sup>                                                                                            | Val w/test   | NN GUI-HL(1)   | 0.57   | 5,000 models tested              |
| ENV(9) <sup>1</sup>                                                                                            | 20% holdback | NN GUI-HL(2)   | 0.76   | 5,000 models tested              |
| ENV(9) <sup>1</sup>                                                                                            | Val col      | NN GUI-HL(2)   | 0.57   | 5,000 models tested              |
| ENV(9) <sup>1</sup>                                                                                            | Val w/test   | NN GUI-HL(2)   | 0.57   | 5,000 models tested              |
| ENV(9) <sup>1</sup>                                                                                            | 20% holdback | NN GUI-HL(1)-6 | 0.65   | 5,000 models tested              |
| ENV(9) <sup>1</sup>                                                                                            | Val col      | NN GUI-HL(1)-6 | 0.70   | 5,000 models tested              |
| ENV(9) <sup>1</sup>                                                                                            | Val w/test   | NN GUI-HL(1)-6 | 0.59   | 5,000 models tested              |
| ENV(9) <sup>1</sup>                                                                                            | 20% holdback | NN GUI-HL(2)-6 | 0.68   | 5,000 models tested              |
| ENV(9) <sup>1</sup>                                                                                            | Val col      | NN GUI-HL(2)-6 | 0.58   | 5,000 models tested              |
| ENV(9) <sup>1</sup>                                                                                            | Val w/test   | NN GUI-HL(2)-6 | 0.63   | 5,000 models tested              |
| ENV(9) <sup>1</sup>                                                                                            | Kfold7       | NIPALS         | 0.15   | 1 factor                         |
| ENV(9) <sup>1</sup>                                                                                            | Val col      | NIPALS         | 0.16   | 1 factor                         |
| ENV(9) <sup>1</sup>                                                                                            | Val w/test   | NIPALS         | failed | 0 factors                        |
| ENV(9) <sup>2</sup>                                                                                            | Kfold7       | NIPALS         | 0.20   | 1 factor                         |
| ENV(9) <sup>2</sup>                                                                                            | Val col      | NIPALS         | 0.25   | 1 factor                         |

| <b>X's (#)</b>                                                                              | <b>Validation</b> | <b>Model type</b> | <b>R<sup>2</sup></b> | <b>Model details</b>  |
|---------------------------------------------------------------------------------------------|-------------------|-------------------|----------------------|-----------------------|
| ENV(9) <sup>2</sup>                                                                         | Val w/test        | NIPALS            | failed               | 0 factors             |
| ENV(9) <sup>3</sup>                                                                         | Kfold7            | NIPALS            | 0.25                 | 1 factor              |
| ENV(9) <sup>3</sup>                                                                         | Val col           | NIPALS            | failed               | 0 factors             |
| ENV(9) <sup>3</sup>                                                                         | Val w/test        | NIPALS            | failed               | 0 factors             |
| ENV(9)-RS                                                                                   | Kfold7            | NIPALS            | 0.20                 | 1 factor              |
| ENV(9)-RS                                                                                   | Val col           | NIPALS            | 0.25                 | 1 factor              |
| ENV(9)-RS                                                                                   | Val w/test        | NIPALS            | failed               | 0 factors             |
| <b>ENV(11): the former nine plus temperature and salinity</b>                               |                   |                   |                      |                       |
| ENV(11) <sup>1</sup>                                                                        | Kfold5            | Model screen      | 0.51                 | NN: TanH(3)-Boost(20) |
| ENV(11) <sup>1</sup>                                                                        | Val col           | Model screen      | 0.47                 | NN: TanH(3)-Boost(20) |
| ENV(11) <sup>1</sup>                                                                        | Val w/test        | Model screen      | 0.43                 | NN: TanH(3)-Boost(20) |
| ENV(11) <sup>1</sup>                                                                        | Kfold5            | NN GUI-HL(1)      | 0.90                 | 1,000 models tested   |
| ENV(11) <sup>1</sup>                                                                        | 10% holdback      | NN GUI-HL(1)      | 0.81 <sup>-</sup>    | 1,100 models tested   |
| ENV(11) <sup>1</sup>                                                                        | 20% holdback      | NN GUI-HL(1)      | 0.83 <sup>-</sup>    | 2,000 models tested   |
| ENV(11) <sup>1</sup>                                                                        | Val col           | NN GUI-HL(1)      | 0.57                 | 1,600 models tested   |
| ENV(11) <sup>1</sup>                                                                        | Val w/test        | NN GUI-HL(1)      | 0.67                 | 1,000 models tested   |
| ENV(11) <sup>1</sup>                                                                        | 20% holdback      | NN GUI-HL(2)      | 0.71                 | 1,000 models tested   |
| ENV(11) <sup>1</sup>                                                                        | Val col           | NN GUI-HL(2)      | 0.58                 | 1,000 models tested   |
| ENV(11) <sup>1</sup>                                                                        | Val w/test        | NN GUI-HL(2)      | 0.54                 | 1,000 models tested   |
| ENV(11) <sup>1</sup>                                                                        | 20% holdback      | NN GUI-HL(1)-6    | 0.90 <sup>-</sup>    | 1,100 models tested   |
| ENV(11) <sup>1</sup>                                                                        | Val col           | NN GUI-HL(1)-6    | 0.82 <sup>-</sup>    | 1,000 models tested   |
| ENV(11) <sup>1</sup>                                                                        | Val w/test        | NN GUI-HL(1)-6    | 0.67                 | 1,000 models tested   |
| ENV(11) <sup>1</sup>                                                                        | 20% holdback      | NN GUI-HL(2)-6    | 0.74                 | 1,000 models tested   |
| ENV(11) <sup>1</sup>                                                                        | Val col           | NN GUI-HL(2)-6    | 0.68                 | 1,000 models tested   |
| ENV(11) <sup>1</sup>                                                                        | Val w/test        | NN GUI-HL(2)-6    | 0.56                 | 20,000 models tested  |
| ENV(11) <sup>1</sup>                                                                        | Kfold7            | NIPALS            | 0.34                 | 2 factors             |
| ENV(11) <sup>1</sup>                                                                        | Val col           | NIPALS            | 0.23                 | 1 factor              |
| ENV(11) <sup>1</sup>                                                                        | Val w/test        | NIPALS            | failed               | 0 factors             |
| ENV(11) <sup>2</sup>                                                                        | Kfold7            | NIPALS            | 0.34                 | 1 factor              |
| ENV(11) <sup>2</sup>                                                                        | Val col           | NIPALS            | 0.35                 | 1 factor              |
| ENV(11) <sup>2</sup>                                                                        | Val w/test        | NIPALS            | failed               | 0 factors             |
| ENV(11) <sup>3</sup>                                                                        | Kfold7            | NIPALS            | 0.37                 | 1 factor              |
| ENV(11) <sup>3</sup>                                                                        | Val col           | NIPALS            | failed               | 0 factors             |
| ENV(11) <sup>3</sup>                                                                        | Val w/test        | NIPALS            | failed               | 0 factors             |
| ENV(11)-RS                                                                                  | Kfold7            | NIPALS            | 0.32                 | 1 factor              |
| ENV(11)-RS                                                                                  | Val col           | NIPALS            | 0.35                 | 1 factor              |
| ENV(11)-RS                                                                                  | Val w/test        | NIPALS            | failed               | 0 factors             |
| <b>ENV(11)+pop: the former 11 plus population (pop) of nearest island (n=12 predictors)</b> |                   |                   |                      |                       |
| ENV(11)+pop                                                                                 | Kfold5            | Model screen      | 0.62                 | NN: TanH(3)-Boost(20) |
| ENV(11)+pop                                                                                 | Val col           | Model screen      | 0.50                 | NN: TanH(3)-Boost(20) |
| ENV(11)+pop                                                                                 | Val w/test        | Model screen      | 0.45                 | NN: TanH(3)-Boost(20) |
| ENV(11)+pop                                                                                 | Kfold5            | NN GUI-HL(1)      | 0.85 <sup>-</sup>    | 300 models tested     |
| ENV(11)+pop                                                                                 | 20% holdback      | NN GUI-HL(1)      | 0.69                 | 1,000 models tested   |
| ENV(11)+pop                                                                                 | Val col           | NN GUI-HL(1)      | 0.56                 | 2,000 models tested   |
| ENV(11)+pop                                                                                 | Val w/test        | NN GUI-HL(1)      | 0.58                 | 2,000 models tested   |

| <b>X's (#)</b>                                                                              | <b>Validation</b> | <b>Model type</b> | <b>R<sup>2</sup></b> | <b>Model details</b>      |
|---------------------------------------------------------------------------------------------|-------------------|-------------------|----------------------|---------------------------|
| ENV(11)+pop                                                                                 | 20% holdback      | NN GUI-HL(2)      | 0.68                 | 2,000 models tested       |
| ENV(11)+pop                                                                                 | Val col           | NN GUI-HL(2)      | 0.55                 | 6,000 models tested       |
| ENV(11)+pop                                                                                 | Val w/test        | NN GUI-HL(2)      | 0.56                 | 2,000 models tested       |
| ENV(11)+pop                                                                                 | 20% holdback      | NN GUI-HL(1)-6    | 0.76                 | 500 models tested         |
| ENV(11)+pop                                                                                 | Val col           | NN GUI-HL(1)-6    | 0.65                 | 500 models tested         |
| ENV(11)+pop                                                                                 | Val w/test        | NN GUI-HL(1)-6    | 0.63                 | 500 models tested         |
| ENV(11)+pop                                                                                 | 20% holdback      | NN GUI-HL(2)-6    | 0.67                 | 1,000 models tested       |
| ENV(11)+pop                                                                                 | Val col           | NN GUI-HL(2)-6    | 0.52                 | 10,000 models tested      |
| ENV(11)+pop                                                                                 | Val w/test        | NN GUI-HL(2)-6    | 0.60                 | 2,000 models tested       |
| ENV(11)+pop                                                                                 | Kfold7            | NIPALS            | 0.34                 | 2 factors                 |
| ENV(11)+pop                                                                                 | Val col           | NIPALS            | 0.24                 | 1 factor                  |
| ENV(11)+pop                                                                                 | Val w/test        | NIPALS            | failed               | 0 factors                 |
| (ENV[11]+pop) <sup>2</sup>                                                                  | Kfold7            | NIPALS            | 0.31                 | 1 factor                  |
| (ENV[11]+pop) <sup>2</sup>                                                                  | Val col           | NIPALS            | 0.35                 | 1 factor                  |
| (ENV[11]+pop) <sup>2</sup>                                                                  | Val w/test        | NIPALS            | failed               | 0 factors                 |
| (ENV[11]+pop) <sup>3</sup>                                                                  | Kfold7            | NIPALS            | 0.37                 | 1 factor                  |
| (ENV[11]+pop) <sup>3</sup>                                                                  | Val col           | NIPALS            | failed               | 0 factors                 |
| (ENV[11]+pop) <sup>3</sup>                                                                  | Val w/test        | NIPALS            | failed               | 0 factors                 |
| ENV(11)+pop-RS                                                                              | Kfold7            | NIPALS            | 0.32                 | 1 factor                  |
| ENV(11)+pop-RS                                                                              | Val col           | NIPALS            | 0.35                 | 1 factor                  |
| ENV(11)+pop-RS                                                                              | Val w/test        | NIPALS            | failed               | 0 factors                 |
| <b>ENV(14): the former 11 ENV plus date, site, &amp; time of day (excluding population)</b> |                   |                   |                      |                           |
| ENV(14) <sup>1</sup>                                                                        | Kfold5            | Model screen      | 0.53                 | NN: TanH(3)-Boost(20)     |
| ENV(14) <sup>1</sup>                                                                        | Val col           | Model screen      | 0.46                 | NN: TanH(3)-Boost(20)     |
| ENV(14) <sup>1</sup>                                                                        | Val w/test        | Model screen      | 0.52                 | Gen-reg-forward selection |
| ENV(14) <sup>1</sup>                                                                        | 20% holdback      | NN GUI-HL(1)      | 0.86 <sup>a</sup>    | 1,500 models tested       |
| ENV(14) <sup>1</sup>                                                                        | Val col           | NN GUI-HL(1)      | 0.76                 | 1,500 models tested       |
| ENV(14) <sup>1</sup>                                                                        | Val w/test        | NN GUI-HL(1)      | 0.83 <sup>a,b</sup>  | 2,000 models tested       |
| ENV(14) <sup>1</sup>                                                                        | 20% holdback      | NN GUI-HL(2)      | 0.80                 | 1,700 models tested       |
| ENV(14) <sup>1</sup>                                                                        | Val col           | NN GUI-HL(2)      | 0.64                 | 1,500 models tested       |
| ENV(14) <sup>1</sup>                                                                        | Val w/test        | NN GUI-HL(2)      | 0.73                 | 1,500 models tested       |
| ENV(14) <sup>1</sup>                                                                        | Kfold7            | NIPALS            | 0.32                 | 1 factor                  |
| ENV(14) <sup>1</sup>                                                                        | Val col           | NIPALS            | 0.32                 | 1 factor                  |
| ENV(14) <sup>1</sup>                                                                        | Val w/test        | NIPALS            | 0.50                 | 7 factors                 |
| ENV(14) <sup>2</sup>                                                                        | Kfold7            | NIPALS            | 0.38                 | 1 factor                  |
| ENV(14) <sup>2</sup>                                                                        | Val col           | NIPALS            | failed               | 0 factors                 |
| ENV(14) <sup>2</sup>                                                                        | Val w/test        | NIPALS            | 0.58                 | 6 factors                 |
| ENV(14) <sup>3</sup>                                                                        | Kfold7            | NIPALS            | failed               | 0 factors                 |
| ENV(14) <sup>3</sup>                                                                        | Val col           | NIPALS            | failed               | 0 factors                 |
| ENV(14) <sup>3</sup>                                                                        | Val w/test        | NIPALS            | 0.61                 | 5 factors                 |
| ENV(14)-RS                                                                                  | Kfold7            | NIPALS            | 0.38                 | 1 factor                  |
| ENV(14)-RS                                                                                  | Val col           | NIPALS            | failed               | 0 factors                 |
| ENV(14)-RS                                                                                  | Val w/test        | NIPALS            | 0.59                 | 6 factors                 |
| <b>ECO(15): the 15 factors scores from a factor analysis of the 50 benthic categories</b>   |                   |                   |                      |                           |
| ECO(15) <sup>1</sup>                                                                        | Kfold5            | Model screen      | 0.54                 | NN                        |



| <b>X's (#)</b>                                                                                        | <b>Validation</b> | <b>Model type</b> | <b>R<sup>2</sup></b> | <b>Model details</b>  |
|-------------------------------------------------------------------------------------------------------|-------------------|-------------------|----------------------|-----------------------|
| ECO(15) <sup>1</sup>                                                                                  | Val col           | Model screen      | 0.27                 | NN                    |
| ECO(15) <sup>1</sup>                                                                                  | Val w/test        | Model screen      | 0.39                 | Boosted tree          |
| ECO(15) <sup>1</sup>                                                                                  | 20% holdback      | NN GUI-HL(1)      | 0.55                 | 1,500 models tested   |
| ECO(15) <sup>1</sup>                                                                                  | Val col           | NN GUI-HL(1)      | 0.37                 | 1,500 models tested   |
| ECO(15) <sup>1</sup>                                                                                  | Val w/test        | NN GUI-HL(1)      | 0.41                 | 1,500 models tested   |
| ECO(15) <sup>1</sup>                                                                                  | 20% holdback      | NN GUI-HL(2)      | 0.61                 | 1,500 models tested   |
| ECO(15) <sup>1</sup>                                                                                  | Val col           | NN GUI-HL(2)      | 0.36                 | 1,500 models tested   |
| ECO(15) <sup>1</sup>                                                                                  | Val w/test        | NN GUI-HL(2)      | 0.45                 | 1,500 models tested   |
| ECO(15) <sup>1</sup>                                                                                  | Kfold7            | NIPALS            | failed               | 0 factors             |
| ECO(15) <sup>1</sup>                                                                                  | Val col           | NIPALS            | failed               | 0 factors             |
| ECO(15) <sup>1</sup>                                                                                  | Val w/test        | NIPALS            | failed               | 0 factors             |
| ECO(15) <sup>2</sup>                                                                                  | Kfold7            | NIPALS            | failed               | 0 factors             |
| ECO(15) <sup>2</sup>                                                                                  | Val col           | NIPALS            | failed               | 0 factors             |
| ECO(15) <sup>2</sup>                                                                                  | Val w/test        | NIPALS            | 0.35                 | 1 factor              |
| ECO(15) <sup>3</sup>                                                                                  | Kfold7            | NIPALS            | failed               | 0 factors             |
| ECO(15) <sup>3</sup>                                                                                  | Val col           | NIPALS            | failed               | 0 factors             |
| ECO(15) <sup>3</sup>                                                                                  | Val w/test        | NIPALS            | 0.30                 | 1 factor              |
| ECO(15)-RS                                                                                            | Kfold7            | NIPALS            | failed               | 0 factors             |
| ECO(15)-RS                                                                                            | Val col           | NIPALS            | failed               | 0 factors             |
| ECO(15)-RS                                                                                            | Val w/test        | NIPALS            | failed               | 0 factors             |
| <b>ENV(11)+pop+7GEN: as above with 7 general (GEN) benthic categories (see OSDF; n=19 predictors)</b> |                   |                   |                      |                       |
| ENV(11)+pop+7GEN                                                                                      | Kfold5            | Model screen      | 0.58                 | NN: TanH(3)-Boost(20) |
| ENV(11)+pop+7GEN                                                                                      | Val col           | Model screen      | 0.58                 | NN: TanH(3)-Boost(20) |
| ENV(11)+pop+7GEN                                                                                      | Val w/test        | Model screen      | 0.46                 | NN: TanH(3)-Boost(20) |
| ENV(11)+pop+7GEN                                                                                      | Kfold5            | NN GUI-HL(1)      | 0.92                 | 5,000 models tested   |
| ENV(11)+pop+7GEN                                                                                      | 20% holdback      | NN GUI-HL(1)      | 0.80                 | 5,000 models tested   |
| ENV(11)+pop+7GEN                                                                                      | Val col           | NN GUI-HL(1)      | 0.81                 | 5,000 models tested   |
| ENV(11)+pop+7GEN                                                                                      | Val w/test        | NN GUI-HL(1)      | 0.66                 | 5,000 models tested   |
| ENV(11)+pop+7GEN                                                                                      | 20% holdback      | NN GUI-HL(2)      | 0.85                 | 500 models tested     |
| ENV(11)+pop+7GEN                                                                                      | Val col           | NN GUI-HL(2)      | 0.70                 | 500 models tested     |
| ENV(11)+pop+7GEN                                                                                      | Val w/test        | NN GUI-HL(2)      | 0.56                 | 500 models tested     |
| ENV(11)+pop+7GEN                                                                                      | 20% holdback      | NN GUI-HL(1)-6    | 0.81                 | 500 models tested     |
| ENV(11)+pop+7GEN                                                                                      | Val col           | NN GUI-HL(1)-6    | 0.69                 | 500 models tested     |
| ENV(11)+pop+7GEN                                                                                      | Val w/test        | NN GUI-HL(1)-6    | 0.62                 | 500 models tested     |
| ENV(11)+pop+7GEN                                                                                      | 20% holdback      | NN GUI-HL(2)-6    | 0.87                 | 2,000 models tested   |
| ENV(11)+pop+7GEN                                                                                      | Val col           | NN GUI-HL(2)-6    | 0.69                 | 2,000 models tested   |
| ENV(11)+pop+7GEN                                                                                      | Val w/test        | NN GUI-HL(2)-6    | 0.65                 | 2,000 models tested   |
| ENV(11)+pop+7GEN                                                                                      | Kfold7            | NIPALS            | 0.30                 | 1 factor              |
| ENV(11)+pop+7GEN                                                                                      | Val col           | NIPALS            | 0.31                 | 1 factor              |
| ENV(11)+pop+7GEN                                                                                      | Val w/test        | NIPALS            | failed               | 0 factors             |
| (ENV[11]+pop+7GEN) <sup>2</sup>                                                                       | Kfold7            | NIPALS            | 0.59                 | 5 factors             |
| (ENV[11]+pop+7GEN) <sup>2</sup>                                                                       | Val col           | NIPALS            | failed               | 0 factors             |
| (ENV[11]+pop+7GEN) <sup>2</sup>                                                                       | Val w/test        | NIPALS            | failed               | 0 factors             |
| (ENV[11]+pop+7GEN) <sup>3</sup>                                                                       | Kfold7            | NIPALS            | failed               | 0 factors             |
| (ENV[11]+pop+7GEN) <sup>3</sup>                                                                       | Val col           | NIPALS            | failed               | 0 factors             |
| (ENV[11]+pop+7GEN) <sup>3</sup>                                                                       | Val w/test        | NIPALS            | failed               | 0 factors             |

| <b>X's (#)</b>                                             | <b>Validation</b> | <b>Model type</b> | <b>R<sup>2</sup></b> | <b>Model details</b>      |
|------------------------------------------------------------|-------------------|-------------------|----------------------|---------------------------|
| ENV(11)+pop+7GEN-RS                                        | Kfold7            | NIPALS            | 0.39                 | 1 factor                  |
| ENV(11)+pop+7GEN-RS                                        | Val col           | NIPALS            | failed               | 0 factors                 |
| ENV(11)+pop+7GEN-RS                                        | Val w/test        | NIPALS            | failed               | 0 factors                 |
| <b>ENV(9)+ECO(15): as defined above (n=24 predictors)</b>  |                   |                   |                      |                           |
| ENV(9)+ECO(15)                                             | Kfold5            | Model screen      | 0.60                 | NN: TanH(3)-Boost(20)     |
| ENV(9)+ECO(15)                                             | Val col           | Model screen      | 0.59                 | NN: TanH(3)-Boost(20)     |
| ENV(9)+ECO(15)                                             | Val w/test        | Model screen      | 0.50                 | NN: TanH(3)-Boost(20)     |
| ENV(9)+ECO(15)                                             | 20% holdback      | NN GUI-HL(1)      | 0.68                 | 100 models tested         |
| ENV(9)+ECO(15)                                             | Val col           | NN GUI-HL(1)      | 0.66                 | 100 models tested         |
| ENV(9)+ECO(15)                                             | Val w/test        | NN GUI-HL(1)      | 0.77                 | 100 models tested         |
| ENV(9)+ECO(15)                                             | 20% holdback      | NN GUI-HL(2)      | 0.71                 | 100 models tested         |
| ENV(9)+ECO(15)                                             | Val col           | NN GUI-HL(2)      | 0.37                 | 100 models tested         |
| ENV(9)+ECO(15)                                             | Val w/test        | NN GUI-HL(2)      | 0.64                 | 100 models tested         |
| ENV(9)+ECO(15)                                             | Kfold7            | NIPALS            | failed               | 0 factors                 |
| ENV(9)+ECO(15)                                             | Val col           | NIPALS            | 0.28                 | 1 factor                  |
| ENV(9)+ECO(15)                                             | Val w/test        | NIPALS            | 0.39                 | 4 factors                 |
| (ENV[9]+ECO[15]) <sup>2</sup>                              | Kfold7            | NIPALS            | failed               | 0 factors                 |
| (ENV[9]+ECO[15]) <sup>2</sup>                              | Val col           | NIPALS            | failed               | 0 factors                 |
| (ENV[9]+ECO[15]) <sup>2</sup>                              | Val w/test        | NIPALS            | failed               | 0 factors                 |
| (ENV[9]+ECO[15]) <sup>3</sup>                              | Kfold7            | NIPALS            | failed               | 0 factors                 |
| (ENV[9]+ECO[15]) <sup>3</sup>                              | Val col           | NIPALS            | failed               | 0 factors                 |
| (ENV[9]+ECO[15]) <sup>3</sup>                              | Val w/test        | NIPALS            | failed               | 0 factors                 |
| (ENV[9]+ECO[15])-RS                                        | Kfold7            | NIPALS            | failed               | 0 factors                 |
| (ENV[9]+ECO[15])-RS                                        | Val col           | NIPALS            | failed               | 0 factors                 |
| (ENV[9]+ECO[15])-RS                                        | Val w/test        | NIPALS            | failed               | 0 factors                 |
| <b>ENV(14)+ECO(15): as defined above (n=29 predictors)</b> |                   |                   |                      |                           |
| ENV(14)+ECO(15)                                            | Kfold5            | Model screen      | 0.75                 | NN                        |
| ENV(14)+ECO(15)                                            | Val col           | Model screen      | 0.51                 | NN                        |
| ENV(14)+ECO(15)                                            | Val w/test        | Model screen      | 0.42                 | Gen-reg-forward selection |
| ENV(14)+ECO(15)                                            | 20% holdback      | NN GUI-HL(1)      | 0.89 <sup>c</sup>    | 1,500 models tested       |
| ENV(14)+ECO(15)                                            | Val col           | NN GUI-HL(1)      | 0.72                 | 1,500 models tested       |
| ENV(14)+ECO(15)                                            | Val w/test        | NN GUI-HL(1)      | 0.80                 | 1,800 models tested       |
| ENV(14)+ECO(15)                                            | 20% holdback      | NN GUI-HL(2)      | 0.79                 | 1,500 models tested       |
| ENV(14)+ECO(15)                                            | Val col           | NN GUI-HL(2)      | 0.57                 | 1,500 models tested       |
| ENV(14)+ECO(15)                                            | Val w/test        | NN GUI-HL(2)      | 0.74                 | 1,500 models tested       |
| ENV(14)+ECO(15)                                            | Kfold7            | NIPALS            | 0.40                 | 1 factor                  |
| ENV(14)+ECO(15)                                            | Val col           | NIPALS            | 0.40                 | 1 factor                  |
| ENV(14)+ECO(15)                                            | Val w/test        | NIPALS            | 0.62                 | 9 factors                 |
| (ENV[14]+ECO[15]) <sup>2</sup>                             | Kfold7            | NIPALS            | failed               | 0 factors                 |
| (ENV[14]+ECO[15]) <sup>2</sup>                             | Val col           | NIPALS            | failed               | 0 factors                 |
| (ENV[14]+ECO[15]) <sup>2</sup>                             | Val w/test        | NIPALS            | failed               | 0 factors                 |
| (ENV[14]+ECO[15]) <sup>3</sup>                             | Kfold7            | NIPALS            | failed               | 0 factors                 |
| (ENV[14]+ECO[15]) <sup>3</sup>                             | Val col           | NIPALS            | failed               | 0 factors                 |
| (ENV[14]+ECO[15]) <sup>3</sup>                             | Val w/test        | NIPALS            | failed               | 0 factors                 |
| (ENV[14]+ECO[15])-RS                                       | Kfold7            | NIPALS            | failed               | 0 factors                 |

| <b>X's (#)</b>                                              | <b>Validation</b> | <b>Model type</b> | <b>R<sup>2</sup></b> | <b>Model details</b>      |
|-------------------------------------------------------------|-------------------|-------------------|----------------------|---------------------------|
| (ENV[14]+ECO[15])-RS                                        | Val col           | NIPALS            | failed               | 0 factors                 |
| (ENV[14]+ECO[15])-RS                                        | Val w/test        | NIPALS            | failed               | 0 factors                 |
| <b>ECO(50): all 50 benthic categories (n=50 predictors)</b> |                   |                   |                      |                           |
| ECO(50) <sup>1</sup>                                        | Kfold5            | Model screen      | 0.52                 | NN                        |
| ECO(50) <sup>1</sup>                                        | Val col           | Model screen      | 0.30                 | NN                        |
| ECO(50) <sup>1</sup>                                        | Val w/test        | Model screen      | 0.20                 | Gen-reg-forward selection |
| ECO(50) <sup>1</sup>                                        | 20% holdback      | NN GUI-HL(1)      | 0.78                 | 1,500 models tested       |
| ECO(50) <sup>1</sup>                                        | Val col           | NN GUI-HL(1)      | 0.67                 | 1,700 models tested       |
| ECO(50) <sup>1</sup>                                        | Val w/test        | NN GUI-HL(1)      | 0.63                 | 1,500 models tested       |
| ECO(50) <sup>1</sup>                                        | 20% holdback      | NN GUI-HL(2)      | 0.60                 | 1,500 models tested       |
| ECO(50) <sup>1</sup>                                        | Val col           | NN GUI-HL(2)      | 0.39                 | 1,700 models tested       |
| ECO(50) <sup>1</sup>                                        | Val w/test        | NN GUI-HL(2)      | 0.57                 | 1,500 models tested       |
| ECO(50) <sup>1</sup>                                        | Kfold7            | NIPALS            | failed               | 0 factors                 |
| ECO(50) <sup>1</sup>                                        | Val col           | NIPALS            | failed               | 0 factors                 |
| ECO(50) <sup>1</sup>                                        | Val w/test        | NIPALS            | failed               | 0 factors                 |
| ECO(50) <sup>2</sup>                                        | Kfold5            | NIPALS            | failed               | 0 factors                 |
| ECO(50) <sup>2</sup>                                        | Val col           | NIPALS            | failed               | 0 factors                 |
| ECO(50) <sup>2</sup>                                        | Val w/test        | NIPALS            | 0.40                 | 3 factors                 |
| ECO(50) <sup>3</sup>                                        | Kfold7            | NIPALS            | 0.24                 | 1 factor                  |
| ECO(50) <sup>3</sup>                                        | Val col           | NIPALS            | failed               | 0 factors                 |
| ECO(50) <sup>3</sup>                                        | Val w/test        | NIPALS            | 0.43                 | 5 factors                 |
| ECO(50)-RS                                                  | Kfold7            | NIPALS            | failed               | 0 factors                 |
| ECO(50)-RS                                                  | Val col           | NIPALS            | failed               | 0 factors                 |
| ECO(50)-RS                                                  | Val w/test        | NIPALS            | 0.26                 | 1 factor                  |
| <b>ENV(9)+ECO(50): as defined above (n=59 predictors)</b>   |                   |                   |                      |                           |
| ENV(9)+ECO(50)                                              | Kfold5            | Model screen      | 0.65                 | NN                        |
| ENV(9)+ECO(50)                                              | Val col           | Model screen      | 0.33                 | NN                        |
| ENV(9)+ECO(50)                                              | Val w/test        | Model screen      | 0.32                 | NN                        |
| ENV(9)+ECO(50)                                              | 20% holdback      | NN GUI-HL(1)      | 0.69                 | 1,500 models tested       |
| ENV(9)+ECO(50)                                              | Val col           | NN GUI-HL(1)      | 0.51                 | 1,500 models tested       |
| ENV(9)+ECO(50)                                              | Val w/test        | NN GUI-HL(1)      | 0.61                 | 1,500 models tested       |
| ENV(9)+ECO(50)                                              | 20% holdback      | NN GUI-HL(2)      | 0.72                 | 1,500 models tested       |
| ENV(9)+ECO(50)                                              | Val col           | NN GUI-HL(2)      | 0.48                 | 1,500 models tested       |
| ENV(9)+ECO(50)                                              | Val w/test        | NN GUI-HL(2)      | 0.41                 | 3,000 models tested       |
| ENV(9)+ECO(50)                                              | Kfold7            | NIPALS            | failed               | 0 factors                 |
| ENV(9)+ECO(50)                                              | Val col           | NIPALS            | 0.32                 | 1 factor                  |
| ENV(9)+ECO(50)                                              | Val w/test        | NIPALS            | failed               | 0 factors                 |
| (ENV[9]+ECO[50]) <sup>2</sup>                               | Kfold7            | NIPALS            | failed               | 0 factors                 |
| (ENV[9]+ECO[50]) <sup>2</sup>                               | Val col           | NIPALS            | failed               | 0 factors                 |
| (ENV[9]+ECO[50]) <sup>2</sup>                               | Val w/test        | NIPALS            | failed               | 0 factors                 |
| (ENV[9]+ECO[50]) <sup>3</sup>                               | Kfold7            | NIPALS            | failed               | 0 factors                 |
| (ENV[9]+ECO[50]) <sup>3</sup>                               | Val col           | NIPALS            | failed               | 0 factors                 |
| (ENV[9]+ECO[50]) <sup>3</sup>                               | Val w/test        | NIPALS            | 0.44                 | 2 factors                 |
| (ENV[9]+ECO[50])-RS                                         | Kfold7            | NIPALS            | failed               | 0 factors                 |
| (ENV[9]+ECO[50])-RS                                         | Val col           | NIPALS            | failed               | 0 factors                 |

| <b>X's (#)</b>                                             | <b>Validation</b> | <b>Model type</b> | <b>R<sup>2</sup></b> | <b>Model details</b> |
|------------------------------------------------------------|-------------------|-------------------|----------------------|----------------------|
| (ENV[9]+ECO[50])-RS                                        | Val w/test        | NIPALS            | failed               | 0 factors            |
| <b>ENV(11)+ECO(50): as defined above (n=61 predictors)</b> |                   |                   |                      |                      |
| ENV(11)+ECO(50)                                            | Kfold5            | Model screen      | 0.52                 | NN                   |
| ENV(11)+ECO(50)                                            | Val col           | Model screen      | 0.62                 | NN                   |
| ENV(11)+ECO(50)                                            | Val w/test        | Model screen      | 0.66                 | NN                   |
| ENV(11)+ECO(50)                                            | 10% holdback      | NN GUI-HL(1)      | 0.83 <sup>a,d</sup>  | 1,000 models tested  |
| ENV(11)+ECO(50)                                            | 20% holdback      | NN GUI-HL(1)      | 0.77                 | 1,900 models tested  |
| ENV(11)+ECO(50)                                            | Val col           | NN GUI-HL(1)      | 0.77                 | 4,600 models tested  |
| ENV(11)+ECO(50)                                            | Val w/test        | NN GUI-HL(1)      | 0.55                 | 2,000 models tested  |
| ENV(11)+ECO(50)                                            | 20% holdback      | NN GUI-HL(2)      | 0.45                 | 500 models tested    |
| ENV(11)+ECO(50)                                            | Val col           | NN GUI-HL(2)      | 0.49                 | 500 models tested    |
| ENV(11)+ECO(50)                                            | Val w/test        | NN GUI-HL(2)      | 0.66                 | 1,000 models tested  |
| ENV(11)+ECO(50)                                            | Kfold7            | NIPALS            | failed               | 0 factors            |
| ENV(11)+ECO(50)                                            | Val col           | NIPALS            | failed               | 0 factors            |
| ENV(11)+ECO(50)                                            | Val w/test        | NIPALS            | 0.64                 | 15 factors           |
| (ENV[11]+ECO[50]) <sup>2</sup>                             | Kfold7            | NIPALS            | failed               | 0 factors            |
| (ENV[11]+ECO[50]) <sup>2</sup>                             | Val col           | NIPALS            | failed               | 0 factors            |
| (ENV[11]+ECO[50]) <sup>2</sup>                             | Val w/test        | NIPALS            | 0.40                 | 1 factor             |
| (ENV[11]+ECO[50]) <sup>3</sup>                             | Kfold7            | NIPALS            | failed               | 0 factors            |
| (ENV[11]+ECO[50]) <sup>3</sup>                             | Val col           | NIPALS            | failed               | 0 factors            |
| (ENV[11]+ECO[50]) <sup>3</sup>                             | Val w/test        | NIPALS            | 0.64                 | 8 factors            |
| (ENV[11]+ECO[50])-RS                                       | Kfold7            | NIPALS            | failed               | 0 factors            |
| (ENV[11]+ECO[50])-RS                                       | Val col           | NIPALS            | failed               | 0 factors            |
| (ENV[11]+ECO[50])-RS                                       | Val w/test        | NIPALS            | 0.41                 | 1 factor             |
| <b>ENV(14)+ECO(50): as defined above (n=64 predictors)</b> |                   |                   |                      |                      |
| ENV(14)+ECO(50)                                            | Kfold5            | Model screen      | 0.61                 | NN                   |
| ENV(14)+ECO(50)                                            | Val col           | Model screen      | 0.52                 | NN                   |
| ENV(14)+ECO(50)                                            | Val w/test        | Model screen      | 0.49                 | NN                   |
| ENV(14)+ECO(50)                                            | 20% holdback      | NN GUI-HL(1)      | 0.92 <sup>a,e</sup>  | 1,500 models tested  |
| ENV(14)+ECO(50)                                            | Val col           | NN GUI-HL(1)      | 0.72                 | 1,500 models tested  |
| ENV(14)+ECO(50)                                            | Val w/test        | NN GUI-HL(1)      | 0.78                 | 1,500 models tested  |
| ENV(14)+ECO(50)                                            | 20% holdback      | NN GUI-HL(2)      | 0.75                 | 5,000 models tested  |
| ENV(14)+ECO(50)                                            | Val col           | NN GUI-HL(2)      | 0.59                 | 1,500 models tested  |
| ENV(14)+ECO(50)                                            | Val w/test        | NN GUI-HL(2)      | 0.74                 | 1,500 models tested  |
| ENV(14)+ECO(50)                                            | Kfold7            | NIPALS            | 0.42                 | 1 factor             |
| ENV(14)+ECO(50)                                            | Val col           | NIPALS            | failed               | 0 factors            |
| ENV(14)+ECO(50)                                            | Val w/test        | NIPALS            | 0.63                 | 15 factors           |
| (ENV[14]+ECO[50]) <sup>2</sup>                             | Kfold7            | NIPALS            | failed               | 0 factors            |
| (ENV[14]+ECO[50]) <sup>2</sup>                             | Val col           | NIPALS            | failed               | 0 factors            |
| (ENV[14]+ECO[50]) <sup>2</sup>                             | Val w/test        | NIPALS            | 0.51                 | 1 factor             |
| (ENV[14]+ECO[50]) <sup>3</sup>                             | Kfold7            | NIPALS            | TCI                  | NA                   |
| (ENV[14]+ECO[50]) <sup>3</sup>                             | Val col           | NIPALS            | failed               | 0 factors            |
| (ENV[14]+ECO[50]) <sup>3</sup>                             | Val w/test        | NIPALS            | 0.64                 | 6 factors            |
| (ENV[14]+ECO[50])-RS                                       | Kfold7            | NIPALS            | failed               | 0 factors            |
| (ENV[14]+ECO[50])-RS                                       | Val col           | NIPALS            | failed               | 0 factors            |

| X's (#)              | Validation | Model type | R <sup>2</sup> | Model details |
|----------------------|------------|------------|----------------|---------------|
| (ENV[14]+ECO[50])-RS | Val w/test | NIPALS     | 0.62           | 9 factors     |

<sup>a</sup>See Table 3. <sup>b</sup>See Figure S1. <sup>c</sup>Excluded from main text tables and figures due to difficulties in interpretation. <sup>d</sup>See Figure 5. <sup>e</sup>See Figure S2.
